# Supplementary material for: Albumin-neprilysin fusion protein: understanding stability using small angle X-ray scattering and molecular dynamic simulations
Source: PubMed Central journal article supplement (PMC7308280; doi:10.1038/s41598-020-67002-9), 2020-06-22
Supplement: 41598_2020_67002_MOESM1_ESM.pdf [file 41598_2020_67002_MOESM1_ESM.pdf]

## Supplementary material

### Albumin-neprilysin fusion protein: understanding stability using small angle X-ray scattering and molecular dynamic simulations

Alina Kulakova<sup>1</sup>, Sowmya Indrakumar<sup>1</sup>, Pernille S nderby<sup>1</sup>, Sujata Mahapatra<sup>2</sup>, Werner W. Streicher<sup>2</sup>, G nther H.J. Peters<sup>1</sup>, Pernille Harris<sup>1</sup>

<sup>1</sup>Department of Chemistry, Technical University of Denmark, 2800 Kgs. Lyngby, Denmark

<sup>2</sup>Novozymes A/S, Biologiens Vej 2, 2800 Kongens Lyngby, Denmark

Table S.1: SAXS experimental details

|                                                                           |                                                                   |              |                                     |
|---------------------------------------------------------------------------|-------------------------------------------------------------------|--------------|-------------------------------------|
| a) Sample details                                                         |                                                                   |              |                                     |
|                                                                           | HSA-NEP fusion protein                                            |              |                                     |
| Organism                                                                  | Chinese Hamster Ovary (CHO) cells                                 |              |                                     |
| Source                                                                    | AstraZeneca                                                       |              |                                     |
| Extinction coefficient (Abs 0.1% = 1 g/L)                                 | 1.04                                                              |              |                                     |
| Molecular weight <i>MW</i> from chemical composition (kDa)                | 146.7                                                             |              |                                     |
| b) SAXS data collection                                                   |                                                                   |              |                                     |
| Instrument                                                                | P12 BioSAXS beamline (PETRAIII)                                   |              |                                     |
| Date                                                                      | 12.17                                                             | 07.18        | 12.18                               |
| Detector                                                                  | PILATUS2M                                                         | PILATUS6M    |                                     |
| Wavelength (nm)                                                           | 1.240                                                             | 1.244        |                                     |
| Beam size (mm <sup>2</sup> )                                              | 0.2 × 0.12                                                        |              |                                     |
| Detector distance (m)                                                     | 3.000                                                             |              |                                     |
| <i>q</i> -measurement range (nm <sup>-1</sup> )                           | 0.027-5.078                                                       | 0.026 -7.288 | 0.0261-7.263                        |
| Absolute scaling method                                                   | Comparison with scattering from pure H <sub>2</sub> O             |              | Comparison with scattering from BSA |
| Normalization                                                             | To transmitted intensity by beam-stop counter                     |              |                                     |
| Monitoring for radiation damage                                           | Frame-by-frame comparison                                         |              |                                     |
| Exposure time (s)                                                         | 20 x 0.05                                                         |              | 30 x 0.095                          |
| Sample configuration                                                      | Quartz glass capillary                                            |              |                                     |
| Sample temperature ( C)                                                   | 20                                                                |              |                                     |
| c) Software employed for SAXS data reduction, analysis and interpretation |                                                                   |              |                                     |
| SAS data reduction                                                        | <i>PRIMUSqt</i> <sup>1</sup> from <i>ATSAS</i> 2.8.3 <sup>2</sup> |              |                                     |
| Basic analyses: Guinier, <i>p(r)</i> , <i>V<sub>p</sub></i>               | <i>PRIMUSqt</i> <sup>1</sup>                                      |              |                                     |
| Ensemble representation of atomic models                                  | <i>EOM</i> <sup>3,4</sup>                                         |              |                                     |
| Molecular graphics                                                        | <i>PyMOL</i> (version 1.8.2.3, Schr dinger, LLC)                  |              |                                     |
| Figures                                                                   | <i>MatLab</i>                                                     |              |                                     |

Table S.2: SAXS data collection overview

| Buffer          | pH  | Additives | $c_{\text{additives}}$ (M)                      | $c_{\text{HSA-NEP}}$ (g/L)                     |
|-----------------|-----|-----------|-------------------------------------------------|------------------------------------------------|
| 10 mM histidine | 5.0 | -         | -                                               | 1.05, 1.62, 3.72, 5.39, 7.42, 10.12, and 14.09 |
|                 |     | NaCl      | 0, 0.035, 0.070, and 0.140                      | 5.83, 6.06, 6.08, and 5.70                     |
|                 | 5.5 | -         | -                                               | 1.20, 2.03, 4.76, 6.62, 9.12, 12.45, and 16.66 |
|                 |     | Urea      | 0, 1, 1.5, 3, 5.5, and 8                        | 6.15, 5.39, 5.7, 5.85, 5.73, and 5.56          |
|                 | 6.5 | -         | -                                               | 1.77, 3.50, 8.74, 12.07, and 17.30             |
|                 |     | NaCl      | 0, 0.035, 0.070, and 0.140                      | 6.05, 5.83, 5.69, and 5.44                     |
|                 |     | Arginine  | 0, 0.035, 0.070, and 0.140                      | 2.80, 2.11, 2.20, and 1.82                     |
| 7.5             | -   | -         | 1.16, 2.40, 5.65, 8.11, 11.30, 17.02, and 22.69 |                                                |
| 10 mM phosphate | 6.5 | -         | -                                               | 2.09, 4.11, 9.59, 15.26, and 20.52             |
| 10 mM tris      | 8.5 | -         | -                                               | 1.02, 2.29, 5.49, 7.56, and 10.49              |

Table S.3: Structural parameters derived from SAXS experiments

|                              | CHSA-NEP<br>(g/L) | CNaCl<br>(mM) | Carginine<br>(mM) | Guinier  |            | $p(r)$   |            |                | Apparent<br>MW (kDa) |        |
|------------------------------|-------------------|---------------|-------------------|----------|------------|----------|------------|----------------|----------------------|--------|
|                              |                   |               |                   | $I(0)/c$ | $R_g$ (nm) | $I(0)/c$ | $R_g$ (nm) | $D_{max}$ (nm) | Guinier              | $p(r)$ |
| 10 mM<br>histidine<br>pH 5.0 | 1.05              | -             | -                 | 0.13     | 4.91       | 0.13     | 5.07       | 16.00          | 180                  | 180    |
|                              | 1.62              | -             | -                 | 0.13     | 4.88       | 0.13     | 5.06       | 16.30          | 180                  | 180    |
|                              | 3.72              | -             | -                 | 0.13     | 4.77       | 0.13     | 4.97       | 16.16          | 180                  | 180    |
|                              | 5.39              | -             | -                 | 0.13     | 4.70       | 0.13     | 4.91       | 15.60          | 180                  | 180    |
|                              | 7.42              | -             | -                 | 0.13     | 4.63       | 0.13     | 4.88       | 15.10          | 180                  | 180    |
|                              | 10.12             | -             | -                 | 0.13     | 4.56       | 0.13     | 4.83       | 15.00          | 180                  | 180    |
|                              | 14.09             | -             | -                 | 0.13     | 4.51       | 0.13     | 4.81       | 14.90          | 180                  | 180    |
|                              | 5.83              | 0             | -                 | 23808*   | 5.03       | 23990*   | 5.19       | 17.72          | 159                  | 160    |
|                              | 6.06              | 35            | -                 | 23961*   | 5.14       | 24030*   | 5.25       | 17.70          | 160                  | 160    |
|                              | 6.08              | 70            | -                 | 23662*   | 5.05       | 23950*   | 5.25       | 18.00          | 158                  | 160    |
| 5.70                         | 140               | -             | 23984*            | 5.19     | 24010*     | 5.29     | 17.50      | 160            | 160                  |        |
| 10 mM<br>histidine<br>pH 5.5 | 1.20              | -             | -                 | 0.11     | 4.86       | 0.11     | 5.05       | 15.60          | 152                  | 152    |
|                              | 2.03              | -             | -                 | 0.10     | 4.78       | 0.11     | 4.98       | 15.40          | 138                  | 152    |
|                              | 4.76              | -             | -                 | 0.11     | 4.76       | 0.11     | 5.08       | 15.70          | 152                  | 152    |
|                              | 6.62              | -             | -                 | 0.10     | 4.45       | 0.10     | 4.83       | 15.10          | 133                  | 138    |
|                              | 9.12              | -             | -                 | 0.09     | 4.33       | 0.10     | 4.75       | 15.10          | 129                  | 138    |
|                              | 12.45             | -             | -                 | 0.09     | 4.16       | 0.10     | 4.69       | 15.00          | 123                  | 138    |
|                              | 16.66             | -             | -                 | 0.08     | 3.68       | 0.09     | 4.45       | 14.50          | 107                  | 125    |
|                              | 6.05              | 0             | -                 | 20350*   | 4.14       | 22620*   | 4.85       | 15.10          | 136                  | 151    |
| 10 mM<br>histidine<br>pH 6.5 | 1.77              | -             | -                 | 0.13     | 4.66       | 0.13     | 5.01       | 15.70          | 180                  | 180    |
|                              | 3.50              | -             | -                 | 0.12     | 4.57       | 0.13     | 4.95       | 15.70          | 166                  | 180    |
|                              | 8.74              | -             | -                 | -        | -          | 0.12     | 4.90       | 15.50          | -                    | 166    |
|                              | 12.07             | -             | -                 | -        | -          | 0.11     | 4.89       | 15.40          | -                    | 152    |
|                              | 17.30             | -             | -                 | -        | -          | 0.10     | 4.67       | 15.10          | -                    | 138    |
|                              | 5.83              | 35            | -                 | 21725*   | 4.65       | 22110*   | 4.89       | 15.50          | 145                  | 148    |
|                              | 5.69              | 70            | -                 | 22255*   | 4.76       | 22540*   | 4.96       | 15.70          | 149                  | 150    |
|                              | 5.44              | 140           | -                 | 22498*   | 4.79       | 22830*   | 5.00       | 15.80          | 150                  | 152    |
|                              | 2.80              | -             | 0                 | 0.086    | 4.62       | 0.09     | 4.95       | 15.77          | 119                  | 125    |
|                              | 2.11              | -             | 35                | 0.093    | 5.00       | 0.09     | 5.13       | 15.80          | 129                  | 125    |
|                              | 2.20              | -             | 70                | 0.093    | 5.03       | 0.09     | 5.17       | 16.00          | 129                  | 125    |
|                              | 1.82              | -             | 140               | 0.090    | 5.17       | 0.09     | 5.21       | 16.20          | 125                  | 125    |
| 10 mM<br>phosphate<br>pH 6.5 | 2.09              | -             | -                 | 0.12     | 4.87       | 0.12     | 5.07       | 15.50          | 166                  | 166    |
|                              | 4.11              | -             | -                 | 0.11     | 4.59       | 0.11     | 4.90       | 15.50          | 152                  | 152    |
|                              | 9.59              | -             | -                 | 0.10     | 4.14       | 0.10     | 4.52       | 14.40          | 133                  | 138    |
|                              | 15.26             | -             | -                 | 0.09     | 3.95       | 0.09     | 4.33       | 14.20          | 125                  | 125    |
|                              | 20.52             | -             | -                 | 0.08     | 3.60       | 0.08     | 4.26       | 14.20          | 111                  | 111    |
| 10 mM<br>histidine<br>pH 7.5 | 1.16              | -             | -                 | 0.12     | 5.03       | 0.12     | 5.45       | 16.60          | 166                  | 166    |
|                              | 2.40              | -             | -                 | 0.12     | 4.92       | 0.12     | 5.43       | 16.60          | 166                  | 166    |
|                              | 5.65              | -             | -                 | 0.12     | 4.98       | 0.13     | 5.50       | 17.00          | 166                  | 180    |
|                              | 8.11              | -             | -                 | 0.12     | 4.92       | 0.13     | 5.42       | 17.00          | 166                  | 180    |
|                              | 11.30             | -             | -                 | 0.12     | 4.76       | 0.13     | 5.53       | 17.80          | 166                  | 180    |
|                              | 17.02             | -             | -                 | -        | -          | 0.13     | 5.22       | 16.60          | -                    | 180    |
|                              | 22.69             | -             | -                 | -        | -          | 0.13     | 5.11       | 16.00          | -                    | 180    |
| 10 mM tris<br>pH 8.5         | 1.02              | -             | -                 | 23795*   | 4.92       | 24490*   | 5.28       | 16.80          | 159                  | 163    |
|                              | 2.29              | -             | -                 | 22704*   | 4.70       | 24020*   | 5.18       | 16.20          | 152                  | 160    |
|                              | 5.49              | -             | -                 | 20674*   | 4.30       | 23280*   | 5.05       | 16.00          | 138                  | 155    |
|                              | 7.56              | -             | -                 | -        | -          | 24800*   | 5.21       | 16.50          | -                    | 166    |
|                              | 10.49             | -             | -                 | -        | -          | 24350*   | 5.14       | 16.50          | -                    | 163    |

Note: \* BSA calibration

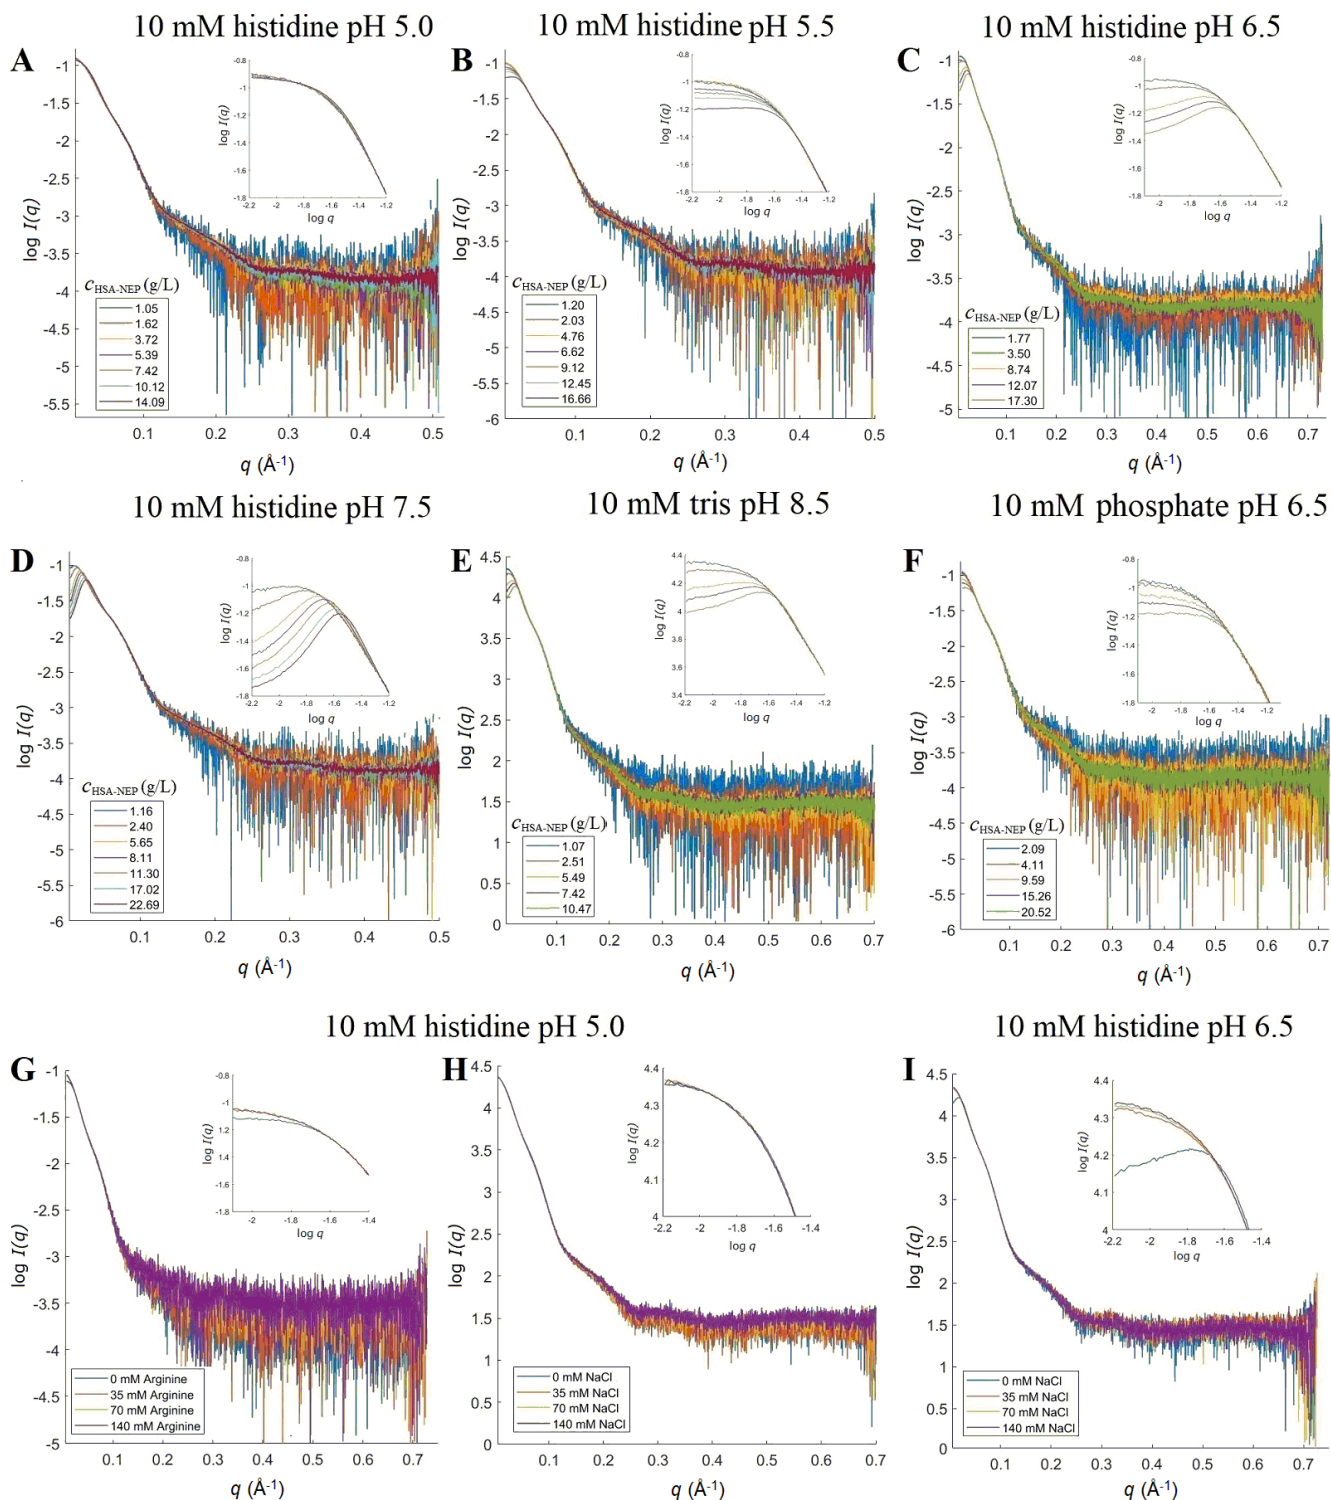

Figure S.1: SAXS data collected at different pH with and without additives. Concentration series: A: 10 mM histidine pH 5.0; B: 10 mM histidine pH 5.5; C: 10 mM histidine pH 6.5; D: 10 mM histidine pH 7.5; E: 10 mM tris pH 8.5; F: 10 mM phosphate pH 6.5. Additives: 10 mM histidine pH 5.0 with G: arginine with  $C_{\text{HSA-NEP}}$  around 2 g/L and H: NaCl with  $C_{\text{HSA-NEP}}$  around 5.5-6 g/L; I: 10 mM histidine pH 6.5 with NaCl with  $C_{\text{HSA-NEP}}$  around 6 g/L.

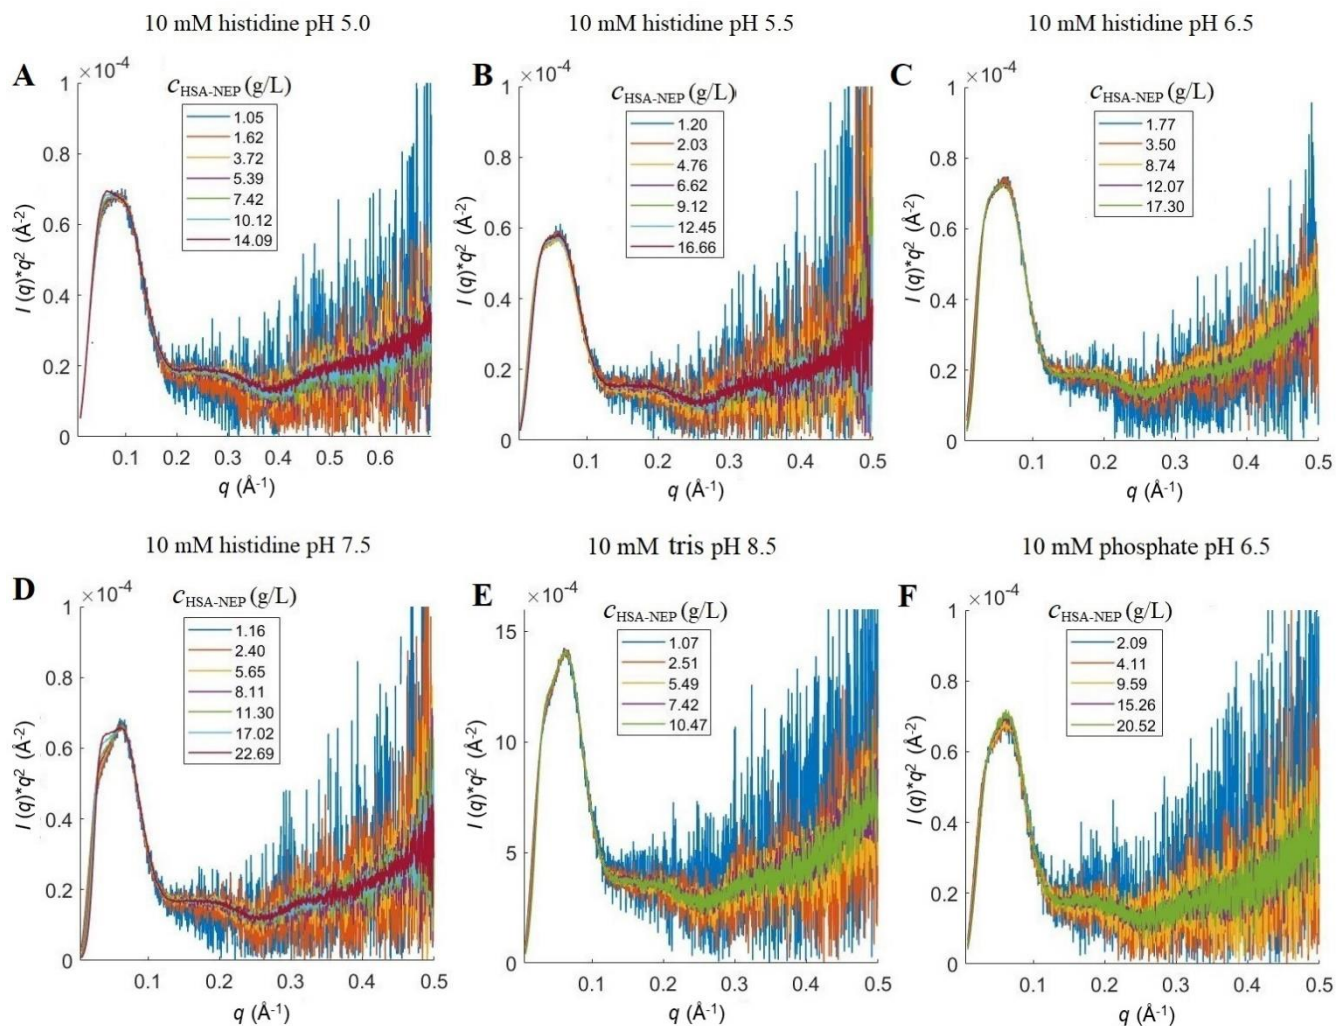

Figure S.2: Kratky plot of a HSA-NEP at different pH: A: 10 mM histidine at pH 5.0; B: 10 mM histidine at pH 5.5; C: 10 mM histidine at pH 6.5; D: 10 mM histidine at pH 7.5; E: 10 mM tris at pH 8.5; F: 10 mM phosphate at pH 6.5.

Table S.4: Structural parameters for merged files used for *EOM*

|                                                                        | Histidine         |                   |                   |                   | Tris              | Phosphate         |
|------------------------------------------------------------------------|-------------------|-------------------|-------------------|-------------------|-------------------|-------------------|
|                                                                        | pH 5.0            | pH 5.5            | pH 6.5            | pH 7.5            | pH 8.5            | pH 6.5            |
| <b>Guinier analysis</b>                                                |                   |                   |                   |                   |                   |                   |
| $I(0)/c$ ( $\text{Lg}^{-1}\text{cm}^{-1}$ )                            | 0.11              | 0.09              | 0.11              | 0.10              | 20250*            | 0.10              |
| $R_g$ (nm)                                                             | 4.38              | 4.33              | 4.28              | 4.36              | 4.35              | 4.27              |
| $q_{\min}$ ( $\text{nm}^{-1}$ )                                        | 0.2812            | 0.2839            | 0.2964            | 0.2875            | 0.2802            | 0.2964            |
| $MW$ from $I(0)$ (ratio to predicted) (kDa)                            | 152 (1.04)        | 127 (0.86)        | 152 (1.04)        | 133 (0.91)        | 135 (0.92)        | 138 (0.94)        |
| <b><math>p(r)</math> analysis</b>                                      |                   |                   |                   |                   |                   |                   |
| $I(0)$ ( $\text{cm}^{-1}$ )                                            | 0.12              | 0.10              | 0.13              | 0.11              | 24520*            | 0.12              |
| $R_g$ (nm)                                                             | 4.83              | 4.93              | 5.05              | 5.15              | 5.28              | 5.06              |
| $D_{\max}$ (nm)                                                        | 15.00             | 15.30             | 16.00             | 16.80             | 16.40             | 16.00             |
| $q$ range ( $\text{nm}^{-1}$ )                                         | 0.2812-<br>1.9013 | 0.2867-<br>1.9013 | 0.2964-<br>2.0127 | 0.2802-<br>1.9058 | 0.2930-<br>1.9082 | 0.2964-<br>1.9989 |
| $\chi^2$ (total estimate from <i>GNOM</i> )                            | 2.897             | 2.650             | 3.622             | 2.908             | 3.083             | 1.395             |
| $MW$ from $I(0)$ (ratio to predicted) (kDa)                            | 166 (1.13)        | 138 (0.94)        | 180 (1.23)        | 152 (1.04)        | 164 (1.12)        | 166 (1.13)        |
| Porod volume ( $\text{nm}^{-3}$ ) (ratio $V_p/\text{calculated } MW$ ) | 235.2 (1.70)      | 243.7 (1.70)      | 245.0 (1.70)      | 241.4 (1.70)      | 245.03 (1.70)     | 236.43 (1.70)     |
| $V$ , $MW$ using Fischer method (ratio of $MW$ to expected)            | 138.4 (0.94)      | 143.4 (0.98)      | 144.1 (0.98)      | 142.0 (0.97)      | 144.1 (0.98)      | 139.1 (0.95)      |

Table S.5:  $R_g$  and  $D_{\max}$  for each HSA-NEP conformation.

| Conformation         | $R_g$ (nm) | $D_{\max}$ (nm) |
|----------------------|------------|-----------------|
| Compact <sub>1</sub> | 3.8        | 13.5            |
| Compact <sub>2</sub> | 4.3        | 14.8            |
| Compact <sub>3</sub> | 3.8        | 12.5            |
| Extended             | 5.1-5.5    | 15.7-17.5       |

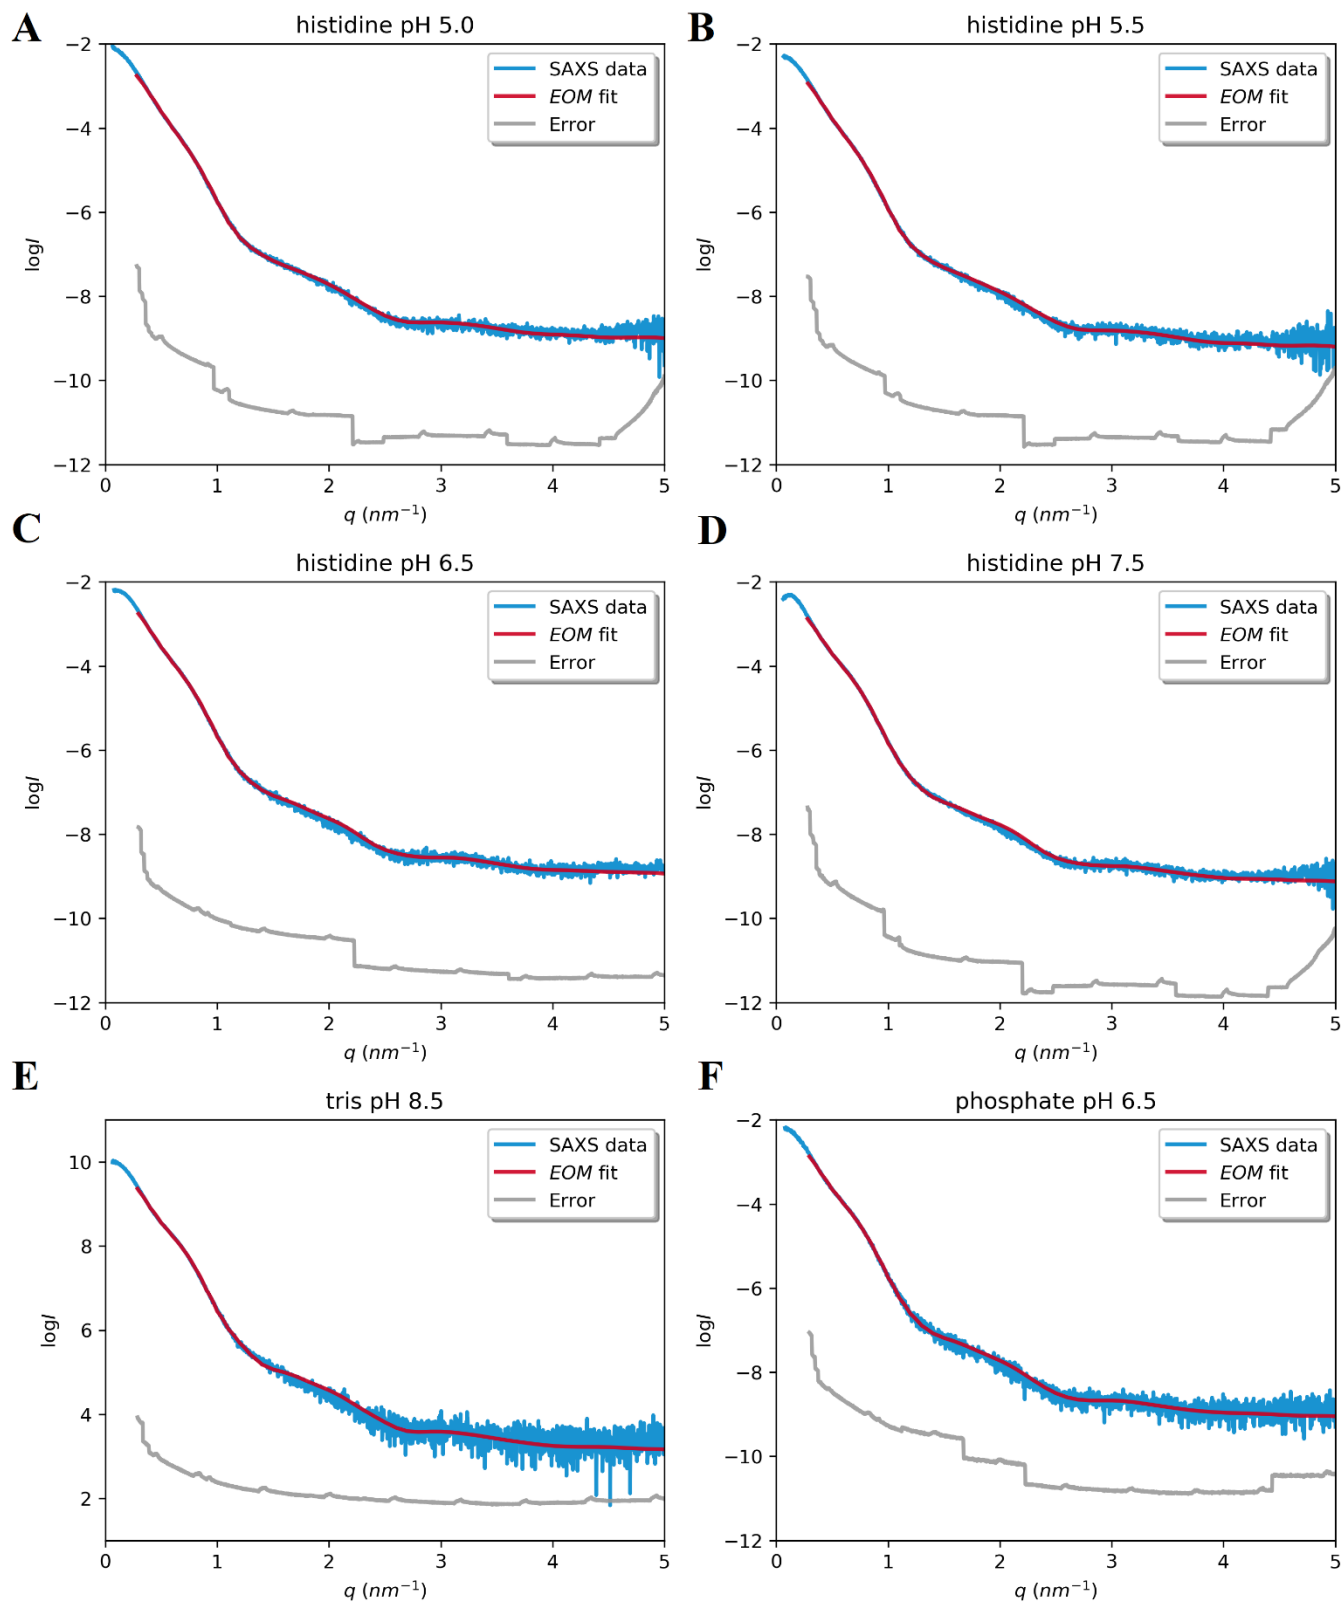

Figure S.3: Fit of *EOM* results against merged experimental data. A: 10 mM histidine pH 5.0; B: 10 mM histidine pH 5.5; C: 10 mM histidine pH 6.5; D: 10 mM histidine pH 7.5; E: 10 mM tris pH 8.5; F: 10 mM phosphate pH 6.5.



Table S.6: Residues that form the HSA-NEP interaction interface for each of the four conformation are listed.

| Conformation         | HSA interface residue                                                               | Linker  | NEP interface residue                                                                                                                   |
|----------------------|-------------------------------------------------------------------------------------|---------|-----------------------------------------------------------------------------------------------------------------------------------------|
| Extended             | 499, 500-506, 535-564, 566-585                                                      | 586-590 | 591-608, 611, 612, 628-630, 636-674, 677-681, 683-687, 946-948, 966, 969-972, 1106-1108                                                 |
| Compact <sub>1</sub> | 113-125, 173, 419-422, 483, 466, 467, 498-517, 527, 535, 536, 538, 558-569, 576-585 | 586-590 | 591, 592, 597-611, 615, 629, 630, 632-639, 648-665, 924, 925, 928-936, 939-948, 966, 969, 970, 1101, 1171, 1172, 1215, 1216, 1238, 1239 |
| Compact <sub>2</sub> | 397, 398, 538-550, 553, 557-585                                                     | 586-590 | 659-669, 672, 673, 676, 677, 680, 1042-1044                                                                                             |
| Compact <sub>3</sub> | 471, 472, 475, 479, 490-492, 494-502, 535-539, 580-585                              | 586-590 | 591, 598-600, 602-607, 632-636, 1215, 1216                                                                                              |

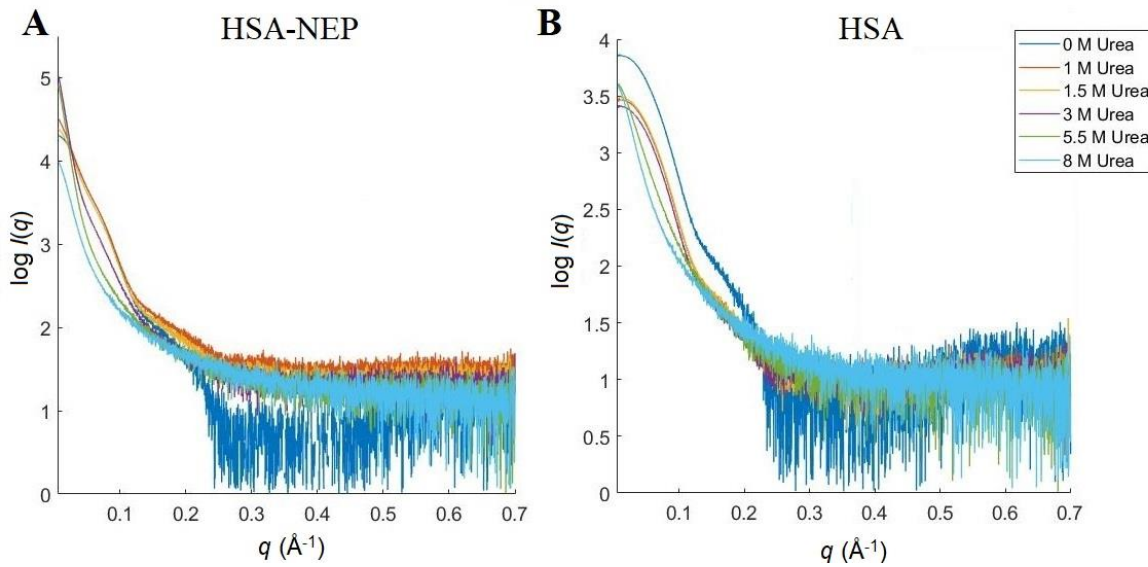

Figure S.4: SAXS scattering curves for A: HSA-NEP and B: HSA in 10 mM histidine pH 5.5 at different concentrations of urea with  $c_{\text{HSA-NEP}}$  around 5 g/L.

## Sequence

DAHKSEVAHRFKDLGEEFNFKALVLI AFAQYLQQSPFEDHVKLVNEVTEFAKTCVADESAENC DKS LHTLFGDKLCT  
VATLRETYGEMADCCA KQEPERNECFLQHKDDNPNL PRLVRPEVDVMCTAFHDNEETFLK KYLYEIARRHPYFYA  
PELLFFAKRYKAAFTECCQAADKAA CLLPKLDEL RDEGKASSAKQRLK CASLQKFGERAFKAWAVARLSQRFPKA  
EFAEVSKLVTDLTKVHTECCHGDLLECADDRADLAKYICENQDSISSKLKECCEKPLLEKSHCIAEVENDEMPADLP  
SLAADFVESKDVCKNYAEAKDVFLGMFLYEYARRHPDYSV VLLLRLAKTYETTLEKCCAAADPHECYAKVFDEFK  
PLVEEPQNLIKQNC ELFQGEYKFQ NALLVRYTKKVPQVSTPTLVEVSRNLGKVGSKCKHPEAKRMPCAEDYLS  
VVLNQLCVLHEKTPVSDRVT KCCTESLVNRRPCFSALEVDETYVPKEFNAETFTFHADICTLSEKERQIKKQTALVE  
LVKHKPKATKEQLKAVMDDFAAFVEKCKADDKETCFAE EGKLVAA SQAALGLGGGGSYDDGICKSSDCIKSA  
ARLIQNMDATTEPCTDFFKYACGGWLKRNVIPETSSRYGNFDILRDELEVVLKDV LQEPKTEDIVAVQKAKALYRS  
CINESAIDSRGGEPLKLLPDIYGW PVATENWEQY GASWTAEK AIAQLNSKYGKKVLINL FVGTDDKNSVN HVIHI  
DQPRGLPSRDYYECTGIYKEACTAYVDFMISVARLIRQEERLPIDENQLALEMNK VMELEKEIANATAKPEDRNDP  
MLLYNKMTLAQIQNNFSLEINGKPF SWL NFTNEIMSTVNISITNEEDVVVYAPEY LTKLPILTKYSARDLQNLMSW  
RFIMDLVSSLSRTYKESRNAFRKALYVTTSETATWRRCANYVNGNMENAVGRLYVEAAFAGESKHVVEDLIAQIRE  
VFIQTLDDLTWMDAETKKRAEEKALAIKERIGYPDDIVSNDNKL NNEYLELNYKEDEYFENIQNLKFSQSKQLKKL  
REKVDKDEWISGA AVVNAFYSSGRNQIVFPAGILQPPFFSAQQSNSLNYGGIGMVIGHEITHGFDDNGRNFNKDGD L



VDWWTQQSASNFKEQSQCMVYQYGNFSWDLAGGQHLNGINTLGENIADNGGLGQAYRAYQNYIKKNGEEKLLP  
GLDLNHNKQLFFLNFAQVWCGTYRPEYAVNSIKTVDHSPKNFRIIGTLQNSAEFSEAFHCRKNSYMNPEKKCRVW  
[Linker](#)

## References

- (1) Konarev, P. V.; Volkov, V. V.; Sokolova, A. V.; Koch, M. H. J.; Svergun, D. I. PRIMUS: A Windows PC-Based System for Small-Angle Scattering Data Analysis. *J. Appl. Crystallogr.* **2003**, *36* (5), 1277–1282. <https://doi.org/10.1107/S0021889803012779>.
- (2) Franke, D.; Petoukhov, M. V.; Konarev, P. V.; Panjkovich, A.; Tuukkanen, A.; Mertens, H. D. T.; Kikhney, A. G.; Hajizadeh, N. R.; Franklin, J. M.; Jeffries, C. M.; et al. ATSAS 2.8: A Comprehensive Data Analysis Suite for Small-Angle Scattering from Macromolecular Solutions. *J. Appl. Crystallogr.* **2017**, *50* (4), 1212–1225. <https://doi.org/10.1107/S1600576717007786>.
- (3) Tria, G.; Mertens, H. D. T.; Kachala, M.; Svergun, D. I. Advanced Ensemble Modelling of Flexible Macromolecules Using X-Ray Solution Scattering. *IUCrJ* **2015**, *2*, 207–217. <https://doi.org/10.1107/S205225251500202X>.
- (4) Bernadó, P.; Mylonas, E.; Petoukhov, M. V.; Blackledge, M.; Svergun, D. I. Structural Characterization of Flexible Proteins Using Small-Angle X-Ray Scattering. *J. Am. Chem. Soc.* **2007**, *129* (17), 5656–5664. <https://doi.org/10.1021/ja069124n>.
